## Levels of Free Fatty Acids (FFA) Are Associated with Insulin Resistance But Do Not Explain the Relationship between Adiposity and Insulin Resistance in Hispanic Americans: The IRAS Family Study

Melissa R. Miller, Rocio I. Pereira, Carl D. Langefeld, Carlos Lorenzo, Jerome I. Rotter, Yii-Der Ida Chen, Richard N. Bergman, Lynne E. Wagenknecht, Jill M. Norris, and Tasha E. Fingerlin

Departments of Epidemiology (M.R.M., J.M.N., T.E.F.) and Biostatistics and Informatics (T.E.F.), Colorado School of Public Health, Department of Medicine (R.I.P.), University of Colorado Denver, Aurora, Colorado 80045; Denver Health and Hospital Authority (R.I.P.), Denver, Colorado 80204; Department of Biostatistical Sciences (C.D.L.), Wake Forest University Health Sciences Center, and Division of Public Health Sciences (L.E.W.), Wake Forest School of Medicine Winston-Salem, North Carolina 27157; Division of Clinical Epidemiology (C.L.), University of Texas Health Sciences Center, San Antonio, Texas 78229; and Medical Genetics Institute (J.I.R., Y.-D.I.C.), Burns and Allen Cedars-Sinai Medical Research Institute, and Cedars-Sinai Diabetes and Obesity Research Institute (R.N.B.), Cedars-Sinai Medical Center, Los Angeles, California 90048

**Context and Objective:** We investigated whether free fatty acids (FFA) mediate the association between adiposity and insulin resistance in the Hispanic-American families of the Insulin Resistance Atherosclerosis Family Study.

**Design:** In 815 Hispanic individuals in the Insulin Resistance Atherosclerosis Family Study, we tested for association between the following: 1) levels of adiposity [body mass index (BMI), visceral and sc adipose tissue area (VAT and SAT)] and circulating levels of FFA; 2) levels of circulating FFA and insulin sensitivity ( $S_i$ ); and 3) levels of adiposity and  $S_i$ , additionally testing to see whether levels of FFA mediated or modified the relationship between adiposity and  $S_i$ .

**Results:** After adjusting for age, sex, clinic site, and admixture, increasing levels of BMI, VAT, and SAT were weakly associated with increasing levels of circulating FFA (BMI:  $P = 0.024$ ; VAT:  $P = 2.33 \times 10^{-3}$ ; SAT:  $P = 0.018$ ; percent variation explained:  $\sim 1.00\%$ ). Increasing levels of circulating FFA were associated with decreasing  $S_i$  ( $P = 8.10 \times 10^{-11}$ ). Increasing BMI, VAT, and SAT were also associated with decreasing  $S_i$  (BMI:  $P = 4.98 \times 10^{-71}$ ; VAT:  $P = 1.48 \times 10^{-64}$ ; SAT:  $P = 4.21 \times 10^{-62}$ ), but this relationship was not significantly mediated by FFA. VAT, but not BMI or SAT, interacts with levels of FFA to influence  $S_i$  ( $P = 0.021$ ).

**Conclusions:** Although levels of circulating FFA are associated both with increasing adiposity and decreasing  $S_i$ , they do not appear to mediate the association between levels of adiposity and  $S_i$  in this large cohort of Hispanic-Americans. These results may indicate that FFA contribute to insulin resistance independent of adiposity. (*J Clin Endocrinol Metab* 97: 3285–3291, 2012)

The prevalence of type 2 diabetes mellitus has steadily risen in the United States and the world in the last decade and is associated with significant morbidity and mortality. Increased insulin resistance has been shown to precede the development of type 2 diabetes mellitus (1–4). Thus, understanding the biological mechanisms of insulin resistance may give great insight into the prevention of type 2 diabetes mellitus. Increasing obesity is associated with insulin resistance (reviewed in Ref. 5), and it has been hypothesized that plasma free fatty acids (FFA) may be an important link between the two (reviewed in Ref. 6).

FFA are used as the main source of fuel in the body during times of fasting or when glucose is not available. FFA are released from adipose tissue and subsequently they travel to target tissues such as skeletal muscle, liver, and others. Increased concentrations of FFA may induce insulin resistance through reduced glucose transport (7), through disruption of the insulin receptor substrate-1 signaling pathway (8), or through activation of the inhibitor of nuclear factor- $\kappa$ B kinase subunit- $\beta$ /nuclear factor- $\kappa$ B inflammatory pathway (9, 10). Lowering levels of FFA has been shown to reduce insulin resistance; normalization of FFA levels improved insulin-stimulated glucose uptake in obese individuals without type 2 diabetes mellitus, individuals with type 2 diabetes mellitus, and lean individuals (11).

Increasing levels of obesity are often associated with increasing levels of circulating FFA (12, 13). This association has been attributed to increases in FFA release (5) and decreases in FFA clearance (14) resulting from increased adipocyte numbers in the enlarged adipose tissue mass. Rates of triglyceride uptake and lipolysis are higher in the visceral adipose tissue compared with the sc tissue depots (15–17). However, because the sc compartment is so much larger than the visceral compartment (reviewed in Ref. 18), the total amount of FFA turnover is greater in the sc compartment.

This work sought to carefully characterize the relationship between obesity, FFA, and insulin resistance in a large cohort of Hispanic-Americans in the Insulin Resistance Atherosclerosis (IRAS) Family Study and to investigate whether levels of FFA may mediate the relationship between obesity and insulin resistance or interact with adiposity to affect insulin resistance.

## Procedures and Methods

### Subject recruitment

Study design, recruitment, and phenotyping for the IRAS Family Study have been described in detail (19). Briefly, the IRAS Family Study is a multicenter study designed to investigate the genetic determinants of glucose homeostasis and adiposity. Pro-

bands who self-identified as Hispanic-American or African-American were first identified from the IRAS cohort study (20), and recruitment was supplemented with non-IRAS participants and their families. All families were recruited based on size and structure without regard to glucose tolerance or type 2 diabetes mellitus status. Hispanic participants were recruited from two clinic sites, one in San Antonio, TX, and one in San Luis Valley, CO. A total of 1081 individuals from San Antonio, TX ( $n = 560$ ), or the San Luis Valley, CO ( $n = 521$ ), making up 90 Hispanic families had a frequently sampled iv glucose tolerance test (FSIGT). All protocols were approved by the institutional review boards at each institution, and all participants provided written informed consent before participation.

### Clinical protocols

Clinic examination of participants included a FSIGT using the reduced sampling protocol as previously described (21). In addition to anthropometric measures of adiposity, abdominal fat area was measured using a computed tomography scan for abdominal adiposity measurements at the L3/L4 and L4/L5 vertebral regions for sc adipose tissue area (SAT) and visceral adipose tissue area (VAT) as previously described (19). Plasma FFA levels were determined by using a colorimetric method (22) from Wako Diagnostics (Richmond, VA; catalog no. 991-34691) on the automated instrument, Elan ATAC8000 (Elan Diagnostics, Athlone, Ireland; interassay variation: 2.3–4.8%; intraassay variation: 5.1–8.6%). The method relies on the acylation of coenzyme A (CoA) by nonesterified fatty acids in the presence of added acyl-CoA synthetase. The resulting acyl-CoA is oxidized by added acyl-CoA oxidase with generation of hydrogen peroxide. In the presence of peroxidase, hydrogen peroxide converts the substrate into a colored product, which can be read at 550 nm by the instrument. FFA data were available on 815 individuals. Characteristics of individuals missing FFA data are shown in Supplemental Table 1, published on The Endocrine Society's Journals Online web site at <http://jcem.endojournals.org>. After adjusting for demographic characteristics such as age, sex, and clinic site, the individuals with and without an FFA measure are not significantly different for characteristics such as body mass index (BMI) and insulin sensitivity ( $S_I$ ).

The outcomes for this study were circulating levels of fasting FFA (described above) and  $S_I$ , a measure of insulin sensitivity derived using a minimal model (23) analysis of glucose and insulin data from the FSIGT (MINMOD Millennium, version 5.18).

### Admixture adjustment

The IRAS Family Study has genotyped 80 unlinked single-nucleotide polymorphisms across the genome on a large fraction of IRAS Family Study participants. These markers were chosen as ancestry informative markers (Dr. Kent Taylor, personal communication) for the purposes of admixture adjustment. Based on a principal-components analysis of these 80 markers, the second principal component explained a significant proportion of the genetic variance in the Hispanic sample and represents the proportion of European admixture for each individual. We adjusted for admixture by including this principal component as a covariate in our association models (see below).

**TABLE 1.** Characteristics of 815 IRAS family study participants

| Characteristic                             | Mean (sd)       |
|--------------------------------------------|-----------------|
| Age (yr)                                   | 39.58 (13.00)   |
| Male/female (n)                            | 316/499         |
| San Antonio/SanLuis Valley (n)             | 438/377         |
| $S_1$ ( $\times 10^{-3}$ min $^{-1}$ /pM)  | 3.69 (3.14)     |
| FFA ( $\mu$ mol/liter)                     | 738.50 (219.38) |
| BMI (kg/m $^2$ ) (n = 809)                 | 28.47 (5.94)    |
| VAT (cm $^2$ ) (n = 787)                   | 104.02 (56.01)  |
| SAT (cm $^2$ ) (n = 787)                   | 334.21 (154.84) |
| VSR (n = 759)                              | 0.35 (0.20)     |
| Adiponectin ( $\mu$ g/ml)                  | 13.44 (6.27)    |
| Admixture principal component <sup>a</sup> | 0.55 (0.13)     |

Values are mean (sd) unless indicated. All participants were nondiabetic, had a complete FSIGT, had a fasting FFA measure, and had been genotyped on 80 ancestry informative markers.

<sup>a</sup> Principal component is based on 80 ancestry informative markers.

### Tests of association

A likelihood ratio test as implemented in the Simultaneous Oligogenic Linkage Analysis Routines software package (Texas Biomedical Research Institute, San Antonio, TX) was used to test for associations between adiposity and plasma levels of FFA, the associations between plasma levels of FFA and  $S_1$ , and the associations between adiposity and  $S_1$ . The Simultaneous Oligogenic Linkage Analysis Routines software package uses a variance components model, which directly models the covariance among related individuals. Continuous-outcome  $S_1$  was natural log transformed for analysis to best approximate the model assumptions (*i.e.* conditional multivariate normality and homogeneity of variance). Individuals with type 2 diabetes mellitus were excluded (61 from San Antonio and 39 from San Luis Valley). To directly compare the associations of each of the adiposity variables [BMI, VAT, SAT, and ratio of VAT to SAT (VSR)] with the outcomes of  $S_1$  or FFA, we calculated regression coefficients based on the sd difference in the adiposity characteristic.

### Mediation analyses

A mediating variable (plasma levels of FFA) is an intermediate variable on the causal pathway between an independent variable (adiposity) and an outcome variable ( $S_1$ ) (Supplemental Fig. 1) (24). To assess the potential for mediation of the relationship between adiposity and  $S_1$  by FFA, we first tested for association between each adiposity measure and plasma levels of

FFA. We then tested for an association between levels of plasma FFA and  $S_1$ . For the adiposity measures that were associated with levels of plasma FFA ( $P < 0.05$ ), we then tested for an association between that adiposity measure and  $S_1$ , recording the parameter estimate for the adiposity measure ( $\beta_{\text{adiposity}}$ ). Finally, we tested for an association between each adiposity measure and  $S_1$ , adjusting for plasma levels of FFA, recording the FFA-adjusted parameter estimate for the adiposity measure ( $\beta_{\text{adiposity\_FFA\_adjusted}}$ ). We used the change in estimate method [ $(\beta_{\text{adiposity}} - \beta_{\text{adiposity\_FFA\_adjusted}})/\beta_{\text{adiposity}}$ ] to estimate the percentage of the association between adiposity and insulin sensitivity that is mediated through plasma levels of FFA (25). This method is identical with the method used to assess confounding; distinguishing between mediation and confounding is based on the biological pathway argument above. We considered a change in estimate of 20% or greater to be meaningful mediation. We also compared the mediation effects for plasma levels of FFA for each adiposity measure to assess whether plasma levels of FFA mediate the association between adiposity and  $S_1$  to a greater degree for certain measures. We use mediation in this context, recognizing that a mediation hypothesis inherently assumes a temporal relationship, with increases in adiposity occurring before increases in FFA and increases in FFA occurring before decreases in  $S_1$ . Because these data are cross-sectional, we tested the statistical associations while making the assumptions of temporality based on biological data (7, 8, 11–13).

### Interaction analyses

We tested whether plasma levels of FFA modify the associations between adiposity measures and  $S_1$  by testing for interaction between the adiposity measure and FFA, using a likelihood ratio test comparing the models with and without the interaction term. The main effects for the FFA and the adiposity measure were also included in the model with the interaction.

### Results

We report the results from 815 individuals of 1081 with a complete FSIGT and a fasting FFA measure who had been genotyped on the 80 ancestry informative markers and who did not have type 2 diabetes mellitus. The number of individuals per family ranged from three to 48 with a mean of 21. Descriptive characteristics for the sample are shown in Table 1.

**TABLE 2.** Associations of adiposity characteristics with FFA

| Outcome | Adiposity measure | sd adiposity measure | $\beta_{\text{adiposity}}^a$ | P value               | Percent variation explained |                                    |
|---------|-------------------|----------------------|------------------------------|-----------------------|-----------------------------|------------------------------------|
|         |                   |                      |                              |                       | Full model (%)              | Adiposity measure (%) <sup>b</sup> |
| FFA     | BMI               | 6.18                 | 17.73                        | 0.024                 | 9.89                        | 0.68                               |
| FFA     | VAT               | 61.42                | 28.34                        | $2.33 \times 10^{-3}$ | 10.36                       | 1.15                               |
| FFA     | SAT               | 154.51               | 18.87                        | 0.018                 | 10.17                       | 0.96                               |
| FFA     | VSR               | 0.211                | −3.50                        | 0.760                 | 9.65                        | 0.44                               |

<sup>a</sup> For a 1 sd change in adiposity measure, adjusted for age, sex, clinic, and admixture.

<sup>b</sup> Determined by subtracting the percent variation in FFA explained by the model without the adiposity measure (9.21%), which is adjusted for age, sex, clinic, and admixture, from the percent of variation in FFA explained by the full model including the adiposity measure.

**TABLE 3.** Association of FFA with  $S_1$ 

| Outcome | Predictor | sd FFA | $\beta_{\text{FFA}}^a$ | P value                | Percent variation explained |                    |
|---------|-----------|--------|------------------------|------------------------|-----------------------------|--------------------|
|         |           |        |                        |                        | Full model %                | FFA % <sup>b</sup> |
| $S_1$   | FFA       | 217    | -0.140                 | $8.10 \times 10^{-11}$ | 11.54                       | 4.13               |

<sup>a</sup> For a 1 sd change in FFA, adjusted for age, sex, clinic, and admixture.

<sup>b</sup> Determined by subtracting the percent of variation in  $S_1$  explained by the model without FFA (7.40%), which is adjusted for age, sex, clinic, and admixture, from the percent variation in  $S_1$  explained by the FFA-adjusted full model.

In separate models, increasing levels of BMI, VAT, and SAT were each independently associated with increasing levels of FFA (Table 2), adjusting for age, sex, admixture, and clinic site. Levels of VSR were not associated with levels of FFA ( $P = 0.760$ ). The proportion of the total variance in FFA that was explained by the adiposity measures was approximately 1% for BMI, VAT, and SAT. VAT had the strongest association with levels of FFA ( $P = 2.33 \times 10^{-3}$ ). For a 1-sd increase in VAT, levels of FFA increased by 28  $\mu\text{mol/liter}$  [95% confidence interval (CI) 10–47  $\mu\text{mol/liter}$ ], whereas for a 1-sd change in BMI or SAT, levels of FFA increased by 18  $\mu\text{mol/liter}$  (95% CI 2–33  $\mu\text{mol/liter}$ ) and 19  $\mu\text{mol/liter}$  (95% CI 3–34  $\mu\text{mol/liter}$ ), respectively.

Increasing levels of FFA were inversely associated with increasing levels of  $S_1$  (Table 3); FFA explained 4.13% of the variance in  $S_1$ .

Because levels of adiposity were associated with FFA and because levels of FFA were associated with  $S_1$ , we then assessed whether levels of FFA mediated the associations between levels of adiposity and  $S_1$ . Increasing levels of BMI, VAT, and SAT were each associated with decreasing levels of  $S_1$  (Table 4, adiposity alone;  $P$  values for adiposity:  $4.98 \times 10^{-71}$ ,  $1.48 \times 10^{-64}$ , and  $4.21 \times 10^{-62}$ , respectively). VAT and SAT explain approximately 28% of the variation in  $S_1$ , and BMI explains approximately 30%. When we additionally adjust for FFA, all three adiposity measures remain significantly associated with  $S_1$  ( $P$  values: BMI:  $1.97 \times 10^{-70}$ ;

VAT:  $1.58 \times 10^{-70}$ ; SAT:  $4.77 \times 10^{-61}$ ) and explain between 26% (VAT, SAT) and 29% (BMI) of the variation in  $S_1$  (Table 4 adiposity adjusted for FFA). FFA are also still significantly associated with  $S_1$  in each of the models ( $P$  values:  $6.22 \times 10^{-8}$  to  $6.20 \times 10^{-9}$ ; data not shown). However, the relationship between adiposity and  $S_1$  is not mediated by FFA to any significant degree (percent mediation: 2.46–3.20%).

We saw a weak statistical association between increasing levels of adiposity and increasing levels of FFA. Because levels of obesity and FFA are physiologically intertwined, we tested whether FFA interacted with measures of adiposity to influence levels of  $S_1$ . We found a significant interaction between VAT and FFA ( $P = 0.021$ ) but not between BMI and FFA ( $P = 0.065$ ) or between SAT and FFA ( $P = 0.598$ ) (Table 5). To understand the effect of the interaction between VAT and FFA on levels of  $S_1$ , we determined the median level of FFA and VAT for the cohort (FFA = 742  $\mu\text{mol/liter}$ ; VAT = 94.08  $\text{cm}^2$ ). We then assigned individuals into four categories based on their FFA and VAT levels as follows: low FFA, low VAT (FFA  $\leq$  742  $\mu\text{mol/liter}$  and VAT  $\leq$  94.08  $\text{cm}^2$ ); low FFA, high VAT (FFA  $\leq$  742  $\mu\text{mol/liter}$  and VAT  $>$  94.08  $\text{cm}^2$ ); high FFA, low VAT (FFA  $>$  742  $\mu\text{mol/liter}$  and VAT  $\leq$  94.08  $\text{cm}^2$ ); and high FFA, high VAT (FFA  $>$  742  $\mu\text{mol/liter}$  and VAT  $>$  94.08  $\text{cm}^2$ ). For each of these four categories, we displayed the predicted  $S_1$ , adjusted for age, gender, ad-

**TABLE 4.** Association of adiposity measures with  $S_1$  (adiposity alone models) and associations of adiposity measures with  $S_1$ , accounting for the effects of FFA (adiposity adjusted for FFA)

| Outcome | Adiposity measure | Adiposity alone <sup>a</sup> |                        |                                       | Adiposity adjusted for FFA <sup>b</sup>     |                        |                                       | Mediation by FFA (%) <sup>g</sup> |
|---------|-------------------|------------------------------|------------------------|---------------------------------------|---------------------------------------------|------------------------|---------------------------------------|-----------------------------------|
|         |                   | $\beta_{\text{adiposity}}^c$ | P value                | Variation full model (%) <sup>d</sup> | $\beta_{\text{adiposity\_FFA\_adjusted}}^e$ | P value                | Variation full model (%) <sup>f</sup> |                                   |
| $S_1$   | BMI               | -0.367                       | $4.98 \times 10^{-71}$ | 37.68                                 | -0.358                                      | $1.97 \times 10^{-70}$ | 40.34                                 | 2.46                              |
| $S_1$   | VAT               | -0.413                       | $1.48 \times 10^{-64}$ | 35.81                                 | -0.399                                      | $1.58 \times 10^{-62}$ | 37.63                                 | 3.20                              |
| $S_1$   | SAT               | -0.349                       | $4.21 \times 10^{-62}$ | 35.35                                 | -0.340                                      | $4.77 \times 10^{-61}$ | 38.33                                 | 2.76                              |

<sup>a</sup> Adjusted for age, sex, clinic, and admixture covariate.

<sup>b</sup> Adjusted for age, sex, admixture, and clinic.

<sup>c</sup> Represents a 1 sd change in adiposity measure in the adiposity-alone model.

<sup>d</sup> Percent of variation explained by age, sex, clinic, admixture covariate, and adiposity measure.

<sup>e</sup> Represents a 1 sd change in adiposity measure in the adiposity model adjusted for FFA.

<sup>f</sup> Percent variation explained by age, sex, clinic, admixture covariate, adiposity measure, and FFA.

<sup>g</sup> Determined by subtracting  $\beta_{\text{adiposity\_FFA\_adjusted}}$  from  $\beta_{\text{adiposity}}$  and dividing by  $\beta_{\text{adiposity}}$ .

**TABLE 5.** Levels of FFA interact with VAT but not BMI or SAT to predict  $S_I$ 

| Outcome | Interaction term <sup>a</sup> | Covariate | $\beta$ -Coefficient <sup>b</sup> | <i>P</i> value <sup>c</sup> |
|---------|-------------------------------|-----------|-----------------------------------|-----------------------------|
| $S_I$   | BMI-FFA                       | BMI       | -0.361                            | $3.59 \times 10^{-71}$      |
|         |                               | FFA       | -0.105                            | $5.02 \times 10^{-9}$       |
| $S_I$   | VAT-FFA                       | BMI-FFA   | 0.033                             | 0.065                       |
|         |                               | VAT       | -0.405                            | $1.11 \times 10^{-63}$      |
|         |                               | FFA       | -0.101                            | $3.40 \times 10^{-8}$       |
|         |                               | VAT-FFA   | 0.042                             | <b>0.021</b>                |
| $S_I$   | SAT-FFA                       | SAT       | -0.340                            | $4.16 \times 10^{-61}$      |
|         |                               | FFA       | -0.106                            | $9.86 \times 10^{-9}$       |
|         |                               | SAT-FFA   | 0.009                             | 0.598                       |

Significant *P* values for interaction between adiposity measure and FFA are shown in bold.

<sup>a</sup> Each model includes age, sex, clinic, and admixture as covariates and is tested for the main effects of FFA, the adiposity measure, plus the interaction between adiposity and FFA.

<sup>b</sup>  $\beta$ -Coefficient is for a 1 sd change in the covariate.

<sup>c</sup> *P* values are for the fully adjusted models, adjusted for age, sex, clinic, admixture, adiposity, FFA, and the interaction of adiposity and FFA.

mixture, clinic site, VAT, FFA, and the interaction of VAT and FFA (Fig. 1). In conditions of high VAT, subjects with low FFA have similar  $S_I$  (mean  $S_I = 2.24$ ; *SD* = 0.80) to individuals with high FFA (mean  $S_I = 1.79$ ; *SD* = 0.75). However, in conditions of low VAT, individuals with low FFA have improved  $S_I$  (mean  $S_I$ : 4.63; *SD* = 1.02) relative to those with high FFA (mean  $S_I = 3.63$ ; *SD* = 0.70).

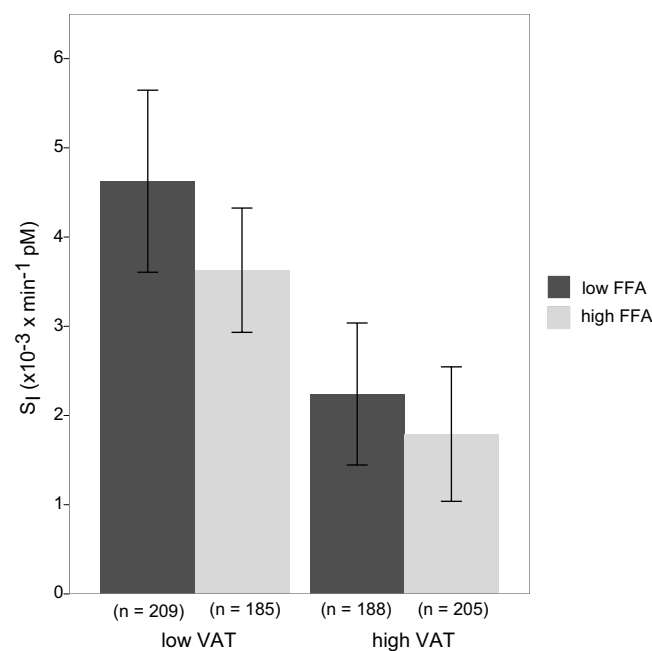

**FIG. 1.** Predicted  $S_I$ , accounting for the interaction between levels of FFA and VAT. The model is adjusted for age, gender, clinic, admixture, VAT, FFA, and the interaction between VAT and FFA. Individuals were assigned into one of four categories based on their FFA and VAT levels: low FFA, low VAT (FFA  $\leq 742 \mu\text{mol}$  and VAT  $\leq 94.08 \text{ cm}^2$ ); low FFA, high VAT (FFA  $\leq 742 \mu\text{mol}$  and VAT  $> 94.08 \text{ cm}^2$ ); high FFA, low VAT (FFA  $> 742 \mu\text{mol}$  and VAT  $\leq 94.08 \text{ cm}^2$ ); and high FFA, high VAT (FFA  $> 742 \mu\text{mol}$  and VAT  $> 94.08 \text{ cm}^2$ ). Values displayed are the mean predicted  $S_I$  for each group. Error bars represent the *SD*.

## Discussion

We have demonstrated an association between increasing adiposity and increasing levels of circulating FFA, between increasing levels of FFA and decreasing levels of  $S_I$ , and between increasing levels of adiposity and decreasing levels of  $S_I$ . Although other studies have examined the relationships between obesity and FFA (12, 13) and between FFA and insulin resistance (7, 8, 26), very few large studies have examined how FFA may mediate or modify the relationship between obesity and insulin resistance. In addition, no studies have looked at these relationships in Hispanics, who show increased risk for obesity, insulin resistance and type 2 diabetes mellitus (27–29).

Contrary to our initial hypothesis, we found that levels of FFA do not mediate the association between adiposity and  $S_I$ . However, our findings suggest that FFA may interact with VAT to influence levels of  $S_I$ . Our study is one of the first to look at whether computer tomography-derived measures of adiposity or insulin sensitivity measures by an FSIGT are associated with fasting levels of FFA. It is also one of the first large studies to examine the relationships between adiposity, FFA, and  $S_I$  in Hispanics.

FFA have been shown to be associated both with measures of adiposity and with insulin sensitivity, and it has also been hypothesized that they are an important link between the two (6). Thus, we hypothesized that the association between adiposity and  $S_I$  might be mediated through FFA. There are several potential reasons that we have not demonstrated this in our present analysis.

First, although we demonstrated an association between increasing levels of adiposity and increased FFA, the relationship was not very strong. Each of the adiposity measures explained only approximately 1% of the variance in FFA. Based on the finding that adiposity is not a strong predictor of FFA in our population, we would not

expect circulating levels of FFA to strongly mediate the relationship between adiposity and  $S_I$ .

Likewise, there are several reasons for the relatively weak association between adiposity and FFA in our study population. Although obesity is thought to lead to an increase in circulating FFA due to increased number of adipocytes (5) and decreased clearance (14), levels of circulating FFA are likely influenced by several other factors, including overall physical activity (30), short- and long-term dietary intake (31, 32), and overall FFA metabolism. Thus, levels of obesity may not strongly correlate with levels of circulating FFA. Participants in this study were not asked to consume a nutrient-standardized meal previous to their fasting blood draw or FSIGT, and diet information was not collected at this clinic visit. Thus, we are not able to account for the effect of short- or long-term dietary intake, nor do we have any means to assess FFA and triglyceride metabolism. Fasting FFA represent only a short period of time during each day, and other time points, such as postprandial FFA, may be more relevant. Finally, our measure of fasting FFA does not take into account the complex nature between FFA, triglycerides, and adipocytes. After a meal, dietary FFA are esterified into triglycerides and then stored in adipocytes for later energy needs (reviewed in Ref. 33). Under fasting states, lipolysis breaks triglycerides into FFA, which then travel to metabolically active tissues such as skeletal muscle and liver. The level of plasma FFA depends on both rates of esterification and lipolysis. Other studies have used stable radiolabeled fatty acid isotopes to show that the rate of appearance of FFA into plasma is greater in obese individuals (34, 35). We cannot assess FFA trafficking in this study.

We did not find that increasing levels of FFA mediated the relationship between increased levels of adiposity and  $S_I$ , despite demonstrating a very strong association between adiposity and  $S_I$ . These results indicate that other factors likely contribute to the association between adiposity and  $S_I$ . Obesity is considered a state of chronic inflammation, whereby inflamed adipose tissue secretes FFA as well as proinflammatory cytokines such as TNF- $\alpha$  and IL-6 (reviewed in Refs. 36 and 37). FFA are known to induce oxidative stress and inflammation, and inflammatory signals disrupt the insulin signaling pathway (36–38). Thus, these proinflammatory cytokines likely also contribute to obesity-related insulin resistance. Unfortunately, this study did not collect inflammatory measures, so we were unable to test this hypothesis.

Given that both obesity and FFA are associated with insulin resistance, we also hypothesized that FFA might modify the association between obesity and  $S_I$ . We found that FFA interact with VAT to influence levels of  $S_I$ . In-

dividuals with higher VAT (above the median) have similar levels of  $S_I$ , regardless of whether they have high or low levels of FFA. However, in individuals with lower VAT, individuals with low levels of FFA have improved levels of  $S_I$  relative to those with high levels of FFA. Because VAT is considered a relatively insulin-resistant tissue, individuals with high levels of VAT may be predisposed to insulin resistance, such that levels of FFA do not additionally impact insulin resistance. However, in individuals with low levels of VAT, increased levels of FFA may additionally contribute to insulin resistance through decreased glucose transport (7) or disruption of normal insulin signaling (8). The fact that adipocytes isolated from VAT are more insulin resistant than those isolated from SAT (39, 40) may explain why we see an interaction between FFA and VAT but no interaction between FFA and SAT.

Increased levels of obesity have long been associated with increased risk of insulin resistance. Our work demonstrates that circulating levels of FFA are also associated with insulin resistance in a large population of Hispanic-Americans. In addition to weight loss, lowering levels of FFA may represent a mechanism to reduce insulin resistance.

Although we did not find that FFA mediate the relationship between obesity and  $S_I$ , we did demonstrate a strong inverse association between levels of circulating FFA and  $S_I$ . Although the mechanisms by which increased levels of FFA disrupt normal insulin signaling are well established, very few population-based studies have examined the associations between circulating levels of FFA and  $S_I$ . Our work has demonstrated that circulating levels of FFA explain 4% of the variance in  $S_I$ . This association persists after adjustment for adiposity, suggesting that the association between FFA and  $S_I$  may be independent of adiposity.

## Acknowledgments

We thank the families who volunteered to participate in the IRAS Family Study.

Address all correspondence and requests for reprints to: Tasha E. Fingerlin, Colorado School of Public Health, University of Colorado Denver, 13001 East 17th Avenue, Box B-119, Aurora, Colorado 80045. E-mail: tasha.fingerlin@ucdenver.edu.

T.E.F. was supported by an American Diabetes Association Junior Faculty Award. R.I.P. was supported by National Institutes of Health National Center for Research Resources Grant K23 RR022238. M.R.M. was supported by an American Heart Association Pre-Doctoral Fellowship. The IRAS Family Study was supported by National Institutes of Health Grants HL-60944-02, HL-61210-02, HL-61019-02, HL-60894, and HL-60931-02.

Disclosure Summary: The authors declared no conflict of interest.

## References

- Lillioja S, Mott DM, Spraul M, Ferraro R, Foley JE, Ravussin E, Knowler WC, Bennett PH, Bogardus C 1993 Insulin resistance and insulin secretory dysfunction as precursors of non-insulin-dependent diabetes mellitus: prospective studies of Pima Indians. *N Engl J Med* 329:1988–1992
- Haffner SM, Miettinen H, Gaskill SP, Stern MP 1995 Decreased insulin secretion and increased insulin resistance are independently related to the 7-year risk of NIDDM in Mexican-Americans. *Diabetes* 44:1386–1391
- Weyer C, Bogardus C, Pratley RE 1999 Metabolic characteristics of individuals with impaired fasting glucose and/or impaired glucose tolerance. *Diabetes* 48:2197–2203
- Lorenzo C, Wagenknecht LE, D'Agostino Jr RB, Rewers MJ, Karter AJ, Haffner SM 2010 Insulin resistance,  $\beta$ -cell dysfunction, and conversion to type 2 diabetes in a multiethnic population. *Diabetes Care* 33:67–72
- Boden G 1997 Role of fatty acids in the pathogenesis of insulin resistance and NIDDM. *Diabetes* 46:3–10
- Boden G 2008 Obesity and free fatty acids. *Endocrinol Metab Clin North Am* 37:635–646, viii–ix
- Dresner A, Laurent D, Marcucci M, Griffin ME, Dufour S, Cline GW, Slezak LA, Andersen DK, Hundal RS, Rothman DL, Petersen KF, Shulman GI 1999 Effects of free fatty acids on glucose transport and IRS-1-associated phosphatidylinositol 3-kinase activity. *J Clin Invest* 103:253–259
- Yu C, Chen Y, Cline GW, Zhang D, Zong H, Wang Y, Bergeron R, Kim JK, Cushman SW, Cooney GJ, Atcheson B, White MF, Kraegen EW, Shulman GI 2002 Mechanism by which fatty acids inhibit insulin activation of insulin receptor substrate-1 (IRS-1)-associated phosphatidylinositol 3-kinase activity in muscle. *J Biol Chem* 277:50230–50236
- Gao Z, Hwang D, Bataille F, Lefevre M, York D, Quon MJ, Ye J 2002 Serine phosphorylation of insulin receptor substrate 1 by inhibitor  $\kappa$ B kinase complex. *J Biol Chem* 277:48115–48121
- Boden G, She P, Mozzoli M, Cheung P, Gumireddy K, Reddy P, Xiang X, Luo Z, Ruderman N 2005 Free fatty acids produce insulin resistance and activate the proinflammatory nuclear factor- $\kappa$ B pathway in rat liver. *Diabetes* 54:3458–3465
- Santomauro AT, Boden G, Silva ME, Rocha DM, Santos RF, Ursich MJ, Strassmann PG, Wajchenberg BL 1999 Overnight lowering of free fatty acids with Acipimox improves insulin resistance and glucose tolerance in obese diabetic and nondiabetic subjects. *Diabetes* 48:1836–1841
- Gordon ES 1960 Non-esterified fatty acids in the blood of obese and lean subjects. *Am J Clin Nutr* 8:740–747
- Reaven GM, Hollenbeck C, Jeng CY, Wu MS, Chen YD 1988 Measurement of plasma glucose, free fatty acid, lactate, and insulin for 24 h in patients with NIDDM. *Diabetes* 37:1020–1024
- Björntorp P, Bergman H, Varnauskas E 1969 Plasma free fatty acid turnover rate in obesity. *Acta Med Scand* 185:351–356
- Björntorp P 1991 Metabolic implications of body fat distribution. *Diabetes Care* 14:1132–1143
- Mårin P, Andersson B, Ottosson M, Olbe L, Chowdhury B, Kvist H, Holm G, Sjöström L, Björntorp P 1992 The morphology and metabolism of intraabdominal adipose tissue in men. *Metabolism* 41:1242–1248
- Arner P 1995 Differences in lipolysis between human subcutaneous and omental adipose tissues. *Ann Med* 27:435–438
- Arner P 1997 Regional adiposity in man. *J Endocrinol* 155:191–192
- Henkin L, Bergman RN, Bowden DW, Ellsworth DL, Haffner SM, Langefeld CD, Mitchell BD, Norris JM, Rewers M, Saad MF, Stamm E, Wagenknecht LE, Rich SS 2003 Genetic epidemiology of insulin resistance and visceral adiposity: the IRAS Family Study design and methods. *Ann Epidemiol* 13:211–217
- Wagenknecht LE, Mayer EJ, Rewers M, Haffner S, Selby J, Borok GM, Henkin L, Howard G, Savage PJ, Saad MF, Bergman RN, Hamman R 1995 The Insulin Resistance Atherosclerosis Study (IRAS): objectives, design, and recruitment results. *Ann Epidemiol* 5:464–472
- Stein GM, Volund A, Kahn SE, Bergman RN 1993 Reduced sample number for calculation of insulin sensitivity and glucose effectiveness from the minimal model. Suitability for use in population studies. *Diabetes* 42:250–256
- Noma A, Okabe H, Kita M 1973 A new colorimetric micro-determination of free fatty acids in serum. *Clin Chim Acta* 43:317–320
- Bergman RN, Finegood DT, Ader M 1985 Assessment of insulin sensitivity *in vivo*. *Endocr Rev* 6:45–86
- Holland PW 1988 Causal inference, path analysis, and recursive structural equations models. *Sociol Methodol* 18:449–493
- MacKinnon DP 1994 Analysis of mediating variables in prevention and intervention research. *NIDA Res Monogr* 139:127–153
- Shulman GI 2000 Cellular mechanisms of insulin resistance. *J Clin Invest* 106:171–176
- Haffner SM, D'Agostino R, Saad MF, Rewers M, Mykkänen L, Selby J, Howard G, Savage PJ, Hamman RF, Wagenknecht LE 1996 Increased insulin resistance and insulin secretion in nondiabetic African-Americans and Hispanics compared with non-Hispanic whites. The Insulin Resistance Atherosclerosis Study. *Diabetes* 45:742–748
- U.S. Centers for Disease Control and Prevention 2010 Health, United States, 2009. Atlanta: Centers for Disease Control and Prevention
- Centers for Disease Control and Prevention 2004 Prevalence of diabetes among Hispanics—selected areas, 1998–2002. *MMWR Morb Mortal Wkly Rep* 53:941–944
- Franks PW, Wong MY, Luan J, Mitchell J, Hennings S, Wareham NJ 2002 Non-esterified fatty acid levels and physical inactivity: the relative importance of low habitual energy expenditure and cardiorespiratory fitness. *Br J Nutr* 88:307–313
- Hernandez TL, Sutherland JP, Wolfe P, Allian-Sauer M, Capell WH, Talley ND, Wyatt HR, Foster GD, Hill JO, Eckel RH 2010 Lack of suppression of circulating free fatty acids and hypercholesterolemia during weight loss on a high-fat, low-carbohydrate diet. *Am J Clin Nutr* 91:578–585
- Chung BH, Hennig B, Cho BH, Darnell BE 1998 Effect of the fat composition of a single meal on the composition and cytotoxic potencies of lipolytically releasable free fatty acids in postprandial plasma. *Atherosclerosis* 141:321–332
- Yu YH, Ginsberg HN 2005 Adipocyte signaling and lipid homeostasis: sequelae of insulin-resistant adipose tissue. *Circ Res* 96:1042–1052
- Horowitz JF, Coppack SW, Paramore D, Cryer PE, Zhao G, Klein S 1999 Effect of short-term fasting on lipid kinetics in lean and obese women. *Am J Physiol* 276(2 Pt 1):E278–E284
- Mittendorfer B, Magkos F, Fabbri E, Mohammed BS, Klein S 2009 Relationship between body fat mass and free fatty acid kinetics in men and women. *Obesity* 17:1872–1877
- Shoelson SE, Herrero L, Naaz A 2007 Obesity, inflammation, and insulin resistance. *Gastroenterology* 132:2169–2180
- Shoelson SE, Lee J, Goldfine AB 2006 Inflammation and insulin resistance. *J Clin Invest* 116:1793–1801
- Tripathy D, Mohanty P, Dhindas S, Syed T, Ghanim H, Aljada A, Dandona P 2003 Elevation of free fatty acids induces inflammation and impairs vascular reactivity in healthy subjects. *Diabetes* 52:2882–2887
- Abate N, Garg A, Peshock RM, Stray-Gundersen J, Grundy SM 1995 Relationships of generalized and regional adiposity to insulin sensitivity in men. *J Clin Invest* 96:88–98
- Frayn KN 2000 Visceral fat and insulin resistance—causative or correlative? *Br J Nutr* 83(Suppl 1):S71–S77
